# Supplementary material for: [Ge(TenBu)4] – a single source precursor for the chemical vapour deposition of germanium telluride thin films
Source: Royal Society of Chemistry journal article supplement (doi:10.1039/c8dt03263g), 2018-11-23
Supplement: c8dt03263g1.pdf [file c8dt03263g1.pdf]

Electronic Supplementary Information

**[Ge(Te<sup>n</sup>Bu)<sub>4</sub>] – a single source precursor for the chemical vapour deposition of germanium telluride thin films**

Samantha L. Hawken<sup>a</sup>, Ruomeng Huang<sup>b</sup>, C. H. (Kees) de Groot<sup>b</sup>, Andrew L. Hector<sup>a</sup>, Marek Jura<sup>c</sup>, William Levason<sup>a</sup>, Gillian Reid<sup>a</sup> and Gavin B. G. Stenning<sup>c</sup>

- School of Chemistry, University of Southampton, Southampton SO17 1BJ, UK. Email: [G.Reid@soton.ac.uk](mailto:G.Reid@soton.ac.uk)
- School of Electronics and Computer Science, University of Southampton, Southampton SO17 1BJ, UK; email:
- ISIS Neutron and Muon Source, Rutherford Appleton Laboratory, Harwell Science and Innovation Campus, Didcot, OX11 0QX, UK.

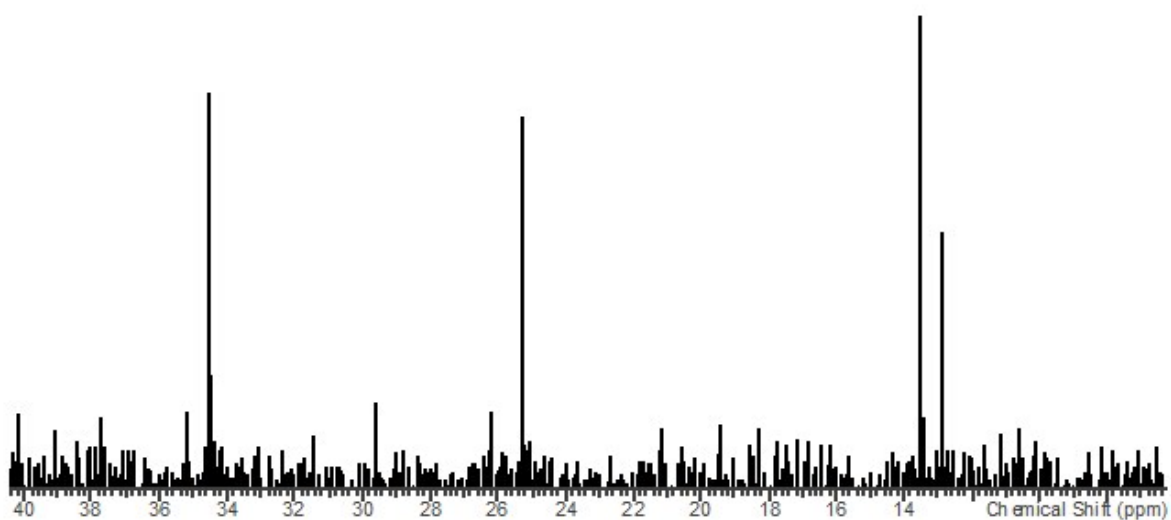

Figure S1: The <sup>13</sup>C{<sup>1</sup>H} NMR spectrum of [Ge(Te<sup>n</sup>Bu)<sub>4</sub>] prepared via Method 2 in CDCl<sub>3</sub> at 295 K.

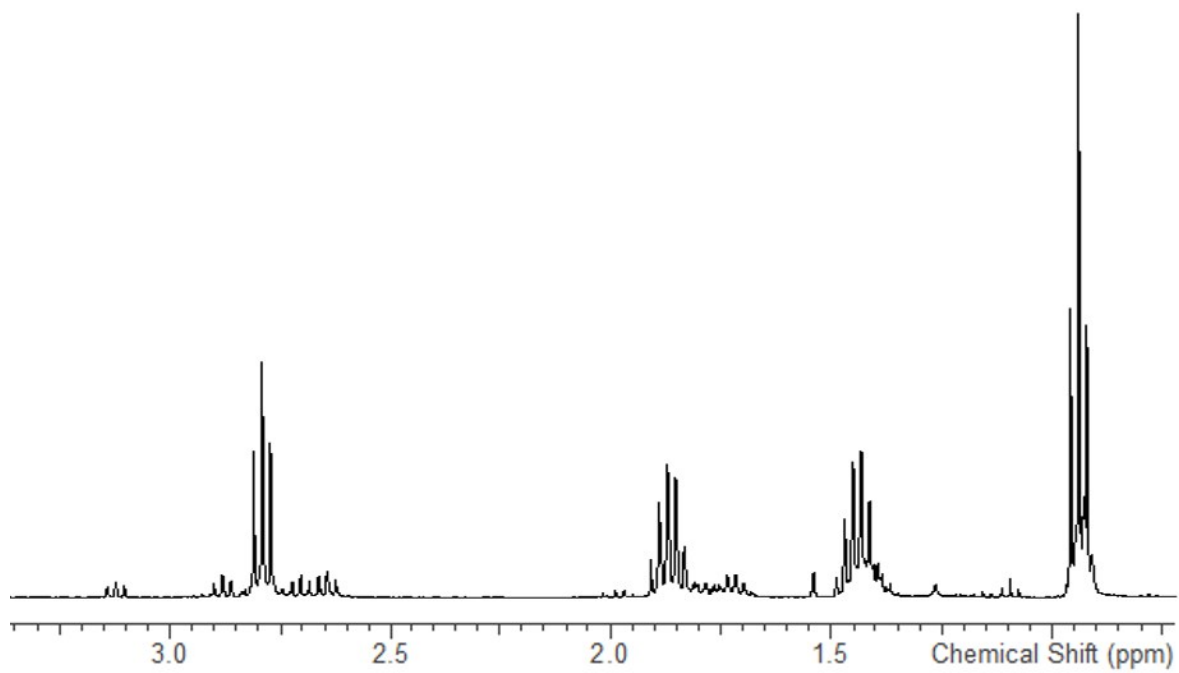

Figure S2: The  $^1\text{H}$  NMR spectrum of  $[\text{Ge}(\text{Te}^n\text{Bu})_4]$  prepared via Method 2, in  $\text{CDCl}_3$  at 295 K.

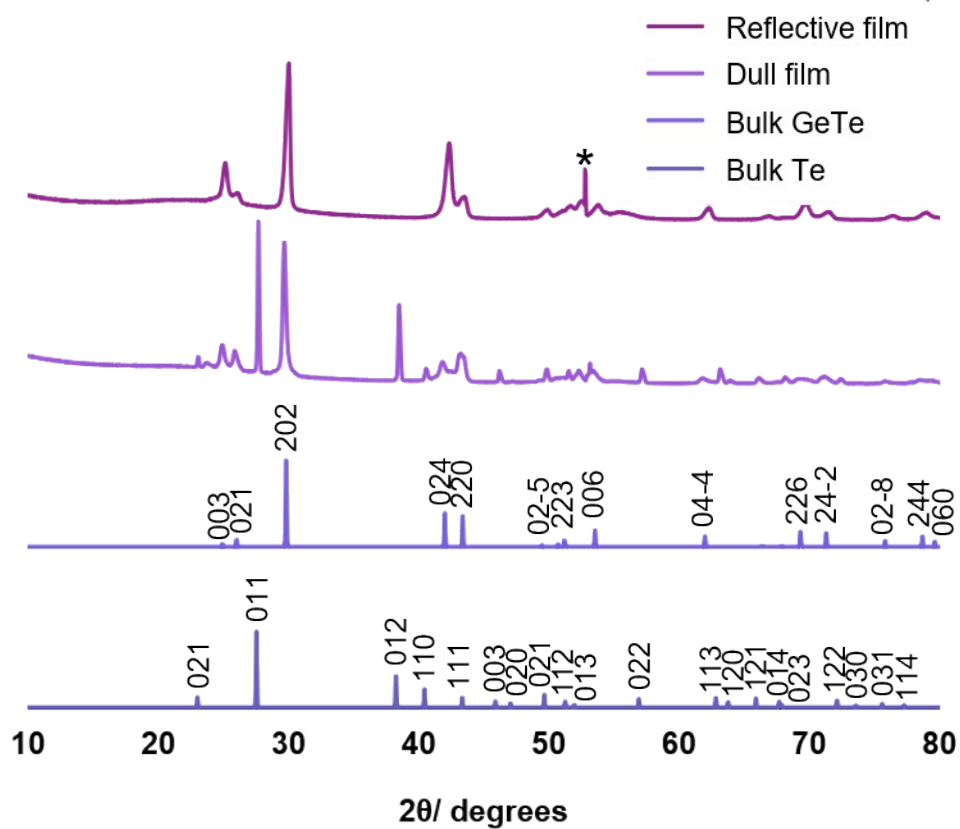

Figure S3: GIXRD pattern from two regions (reflective and dull) of a thin film deposited onto SiO<sub>2</sub> at 723 K /0.02 mmHg from [Ge(Te<sup>n</sup>Bu)<sub>4</sub>] synthesised in Method 1 and indexed XRD patterns for bulk GeTe and Te. The peak due to the Si underlying the SiO<sub>2</sub> in the substrate is marked \*.
